# Supplementary material for: First observations of the McMurdo–South Pole oblique ionospheric HF channel
Source: Copernicus journal article supplement (doi:10.5194/amt-13-3023-2020), 2020-06-09
Supplement: Supplementary file 1 [file amt-13-3023-2020-supplement.zip]

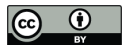

## *Supplement of*

# **First observations of the McMurdo–South Pole oblique ionospheric HF channel**

**Alex T. Chartier et al.**

*Correspondence to:* Alex T. Chartier ([alex.chartier@jhuapl.edu](mailto:alex.chartier@jhuapl.edu))

- amt-13-3023-2020-supplement-title-page.pdf
- plots
  - .DS\_Store
  - doppler
    - \* rtd\_2019Feb28.png
    - \* rtd\_2019Mar01.png
    - \* rtd\_2019Mar02.png
    - \* rtd\_2019Mar03.png
    - \* rtd\_2019Mar04.png
    - \* rtd\_2019Mar05.png
    - \* rtd\_2019Mar06.png
    - \* rtd\_2019Mar07.png
    - \* rtd\_2019Mar08.png
    - \* rtd\_2019Mar09.png
    - \* rtd\_2019Mar10.png
    - \* rtd\_2019Mar11.png
    - \* rtd\_2019Mar12.png
    - \* rtd\_2019Mar13.png
    - \* rtd\_2019Mar14.png
    - \* rtd\_2019May24.png
    - \* rtd\_2019May25.png
  - power
    - \* rtd\_2019Feb28.png
    - \* rtd\_2019Mar01.png
    - \* rtd\_2019Mar02.png
    - \* rtd\_2019Mar03.png
    - \* rtd\_2019Mar04.png

- \* rtd\_2019Mar05.png
- \* rtd\_2019Mar06.png
- \* rtd\_2019Mar07.png
- \* rtd\_2019Mar08.png
- \* rtd\_2019Mar09.png
- \* rtd\_2019Mar10.png
- \* rtd\_2019Mar11.png
- \* rtd\_2019Mar12.png
- \* rtd\_2019Mar13.png
- \* rtd\_2019Mar14.png
- \* rtd\_2019May24.png
- \* rtd\_2019May25.png

The copyright of individual parts of the supplement might differ from the CC BY 4.0 License.
